# Supplementary material
Source: PubMed Central journal article supplement (PMC7529938)
Supplement: NIHMS1603212-supplement-supplemental_material_2.pdf [file NIHMS1603212-supplement-supplemental_material_2.pdf]

**Supplemental Table 1. Influence of Factors on Temporal Vein Retinal Blood Flow**

| Factors                       | Univariate Analysis |              |                  | Multivariable Analysis |              |              |
|-------------------------------|---------------------|--------------|------------------|------------------------|--------------|--------------|
|                               | Coefficient         | 95% CI       | p value          | Coefficient            | 95% CI       | p value      |
| Age, per year                 | 0.04                | -0.02, 0.13  | 0.146            | -                      | -            | -            |
| Gender, female                | 1.18                | 0.57, 1.80   | <b>&lt;0.001</b> | 1.90                   | 0.70, 3.11   | <b>0.002</b> |
| Axial length, mm              | -0.69               | -1.21, -0.17 | <b>0.010</b>     | -0.21                  | -0.70, 0.28  | 0.399        |
| IOP, mmHg                     | -0.01               | -0.25, 0.23  | 0.928            | -                      | -            | -            |
| SBP, mmHg                     | 0.03                | -0.03, 0.10  | 0.311            | -                      | -            | -            |
| DBP, mmHg                     | 0.01                | -0.05, 0.07  | 0.663            | -                      | -            | -            |
| MOPP, mmHg                    | 0.03                | -0.06, 0.13  | 0.494            | -                      | -            | -            |
| HR, bpm                       | -0.03               | -0.11, 0.05  | 0.410            | -                      | -            | -            |
| Hypertension                  | 0.19                | -0.65, 1.02  | 0.655            | -                      | -            | -            |
| RS, dB                        | 0.17                | -0.01, 0.36  | 0.068            | -                      | -            | -            |
| RNFLT <sup>a</sup> , per 10µm | 0.48                | 0.29, 0.67   | <b>&lt;0.001</b> | 0.25                   | -0.07, 0.57  | 0.124        |
| GCCT, per 10µm                | 0.87                | 0.45, 1.28   | <b>&lt;0.001</b> | -0.04                  | -0.60, 0.52  | 0.890        |
| Group:                        |                     |              |                  |                        |              |              |
| Healthy hemisphere            |                     | Reference    |                  |                        | Reference    |              |
| Normal hemisphere             | -2.34               | -3.77, -0.92 | <b>0.002</b>     | -1.75                  | -3.24, -0.26 | <b>0.022</b> |
| Damaged hemisphere            | -3.67               | -5.10, -2.25 | <b>&lt;0.001</b> | -2.37                  | -4.49, -0.25 | <b>0.028</b> |

Abbreviations: IOP, intraocular pressure; SBP, systolic blood pressure; DBP, diastolic blood pressure; MOPP, mean ocular perfusion pressure; HR, heart rate; RS, retinal sensitivity; RNFLT, retinal nerve fiber layer thickness; GCCT, ganglion cell complex thickness

<sup>a</sup> Measured in superior (46°–135°) and inferior (226°–315°) quadrants

Boldface indicates statistically significant difference.
