# Supplementary material
Source: PubMed Central journal article supplement (PMC7529938)
Supplement: NIHMS1603212-supplement-supplemental_material_3.pdf [file NIHMS1603212-supplement-supplemental_material_3.pdf]

**Supplemental Table 2. List of Topical and Systemic Medications Used in the Present Study**

| Medications                             | NTG Eyes (n = 43) |                                                                |                                                                | Healthy Eyes (n = 24) |                                                                |                                                                |
|-----------------------------------------|-------------------|----------------------------------------------------------------|----------------------------------------------------------------|-----------------------|----------------------------------------------------------------|----------------------------------------------------------------|
|                                         | No. (%)           | OR per $\mu\text{L}/\text{min}$<br>Average TA<br>RBF (p value) | OR per $\mu\text{L}/\text{min}$<br>Average TV<br>RBF (p value) | No. (%)               | OR per $\mu\text{L}/\text{min}$<br>Average TA<br>RBF (p value) | OR per $\mu\text{L}/\text{min}$<br>Average TV<br>RBF (p value) |
| Prostaglandin analogs                   | 36 (84)           | 0.80 (0.11)                                                    | 0.88 (0.19)                                                    | 0                     | –                                                              | –                                                              |
| Topical beta blockers                   | 22 (51)           | 0.93 (0.48)                                                    | 0.97 (0.75)                                                    | 0                     | –                                                              | –                                                              |
| Topical carbonic anhydrase inhibitors   | 18 (42)           | 0.94 (0.54)                                                    | 0.97 (0.67)                                                    | 0                     | –                                                              | –                                                              |
| $\alpha$ 2-adrenergic agonists          | 6 (14)            | 0.86 (0.29)                                                    | 0.83 (0.12)                                                    | 0                     | –                                                              | –                                                              |
| Rho-associated protein kinase inhibitor | 3 (7)             | 0.99 (0.94)                                                    | 0.93 (0.68)                                                    | 0                     | –                                                              | –                                                              |
| Calcium channel blockers                | 5 (12)            | 0.96 (0.79)                                                    | 0.98 (0.87)                                                    | 3 (13)                | 0.83 (0.51)                                                    | 1.08 (0.67)                                                    |
| Diuretics                               | 1 (2)             | 1.26 (0.50)                                                    | 1.32 (0.30)                                                    | 0                     | –                                                              | –                                                              |
| Angiotensin II receptor blockers        | 3 (7)             | 0.73 (0.16)                                                    | 0.88 (0.45)                                                    | 3 (13)                | 0.54 (0.13)                                                    | 0.56 (0.14)                                                    |
| Anti-platelets                          | 4 (9)             | 0.82 (0.27)                                                    | 0.94 (0.69)                                                    | 3 (13)                | 0.82 (0.49)                                                    | 0.71 (0.26)                                                    |
| Anti-lipids                             | 9 (21)            | 0.90 (0.44)                                                    | 1.00 (0.98)                                                    | 4 (17)                | 1.19 (0.41)                                                    | 1.00 (0.98)                                                    |
| Pacemaker                               | 2 (5)             | 1.10 (0.68)                                                    | 0.91 (0.72)                                                    | 0                     | –                                                              | –                                                              |
| Asthma medications                      | 3 (7)             | 0.65 (0.07)                                                    | 0.82 (0.27)                                                    | 1 (4)                 | 0.92 (0.84)                                                    | 1.30 (0.36)                                                    |

Abbreviations: NTG, normal tension glaucoma; OR, odds ratio; TA, temporal artery; RBF, retinal blood flow; TV, temporal vein

Calculated as logistic regression analysis, with  $p < 0.05$  considered to be statistically significant
