# Supplementary material
Source: PubMed Central journal article supplement (PMC7529938)

Supplemental Figure 1

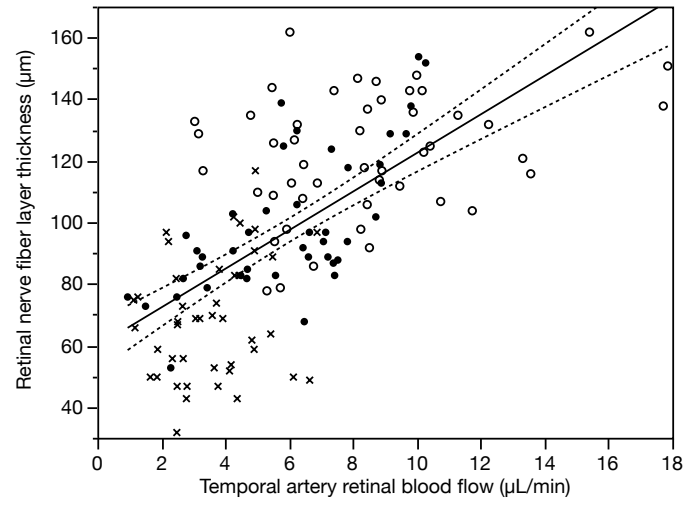

Supplement: NIHMS1603212-supplement-supplemental_material_1.pdf [file NIHMS1603212-supplement-supplemental_material_1.pdf]
